# Supplementary material for: Wheat ABA Receptor TaPYL5 Constitutes a Signaling Module with Its Downstream Partners TaPP2C53/TaSnRK2.1/TaABI1 to Modulate Plant Drought Response
Source: MDPI journal article supplement (doi:10.3390/ijms24097969), 2023-04-27
Supplement: s1 [file s1]

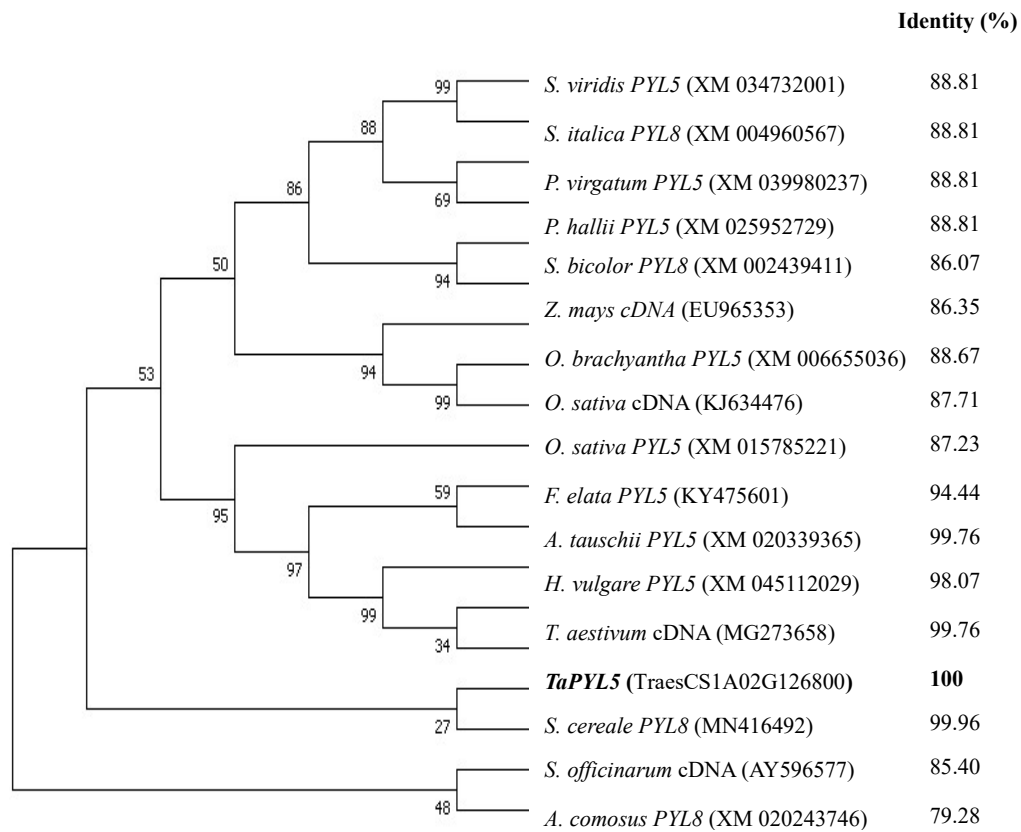

**Supplementary Figure S1.** Phylogenetic relations among *TaPYL5* and its homologous genes distributed in various plant species.

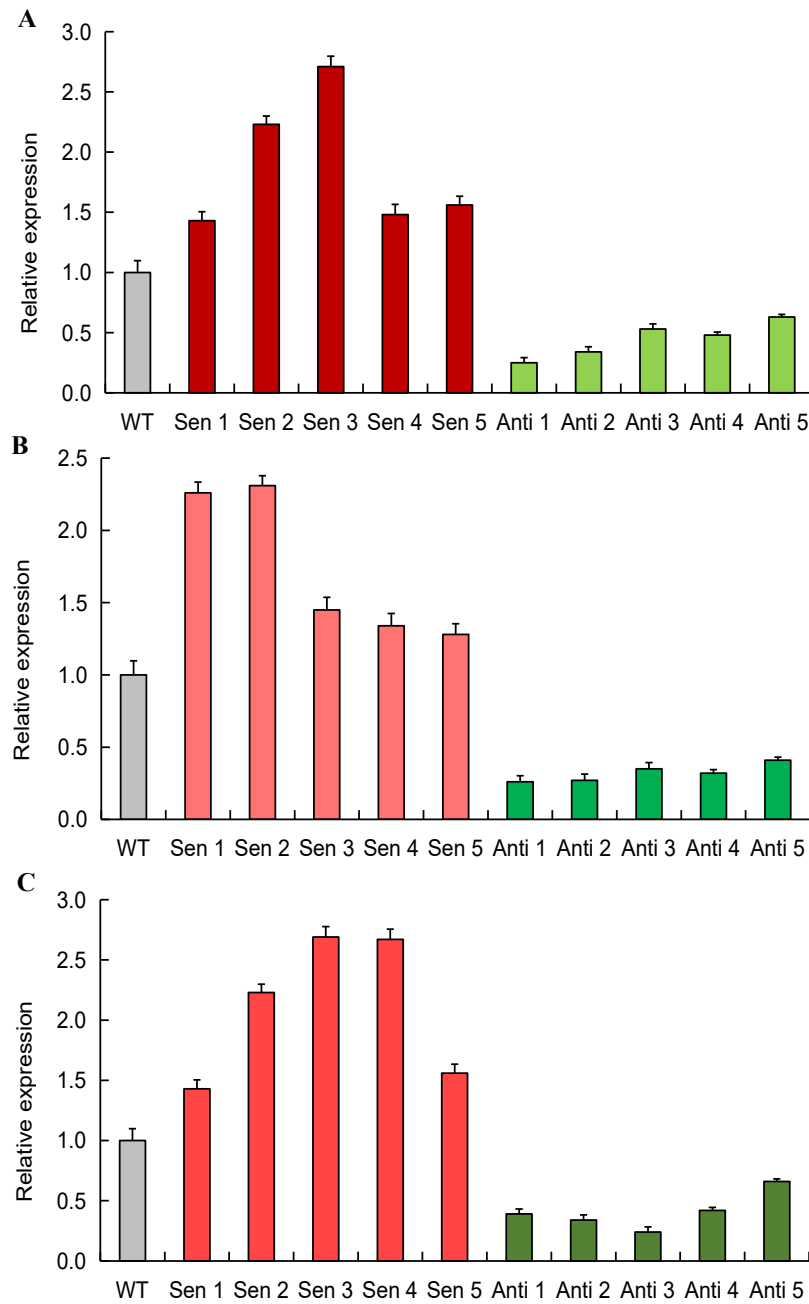

**Supplementary Figure S2.** Expression levels of the target gene in *TaPYL5*, *TaPPP2C53* and *TaSnRK2.1* transgenic wheat lines. **(A)** Expression levels of *TaPYL5* in transgenic lines. **(B)** Expression levels of *TaPPP2C53* in transgenic lines. **(C)** Expression levels of *TaSnRK2.1* in transgenic lines. WT, wild type. Data are shown by average from triplicate results plus standard error. The expression values were normalized by *Tatubulin*, a constitutive gene in *T. aestivum* species whose expression level was set as 1.

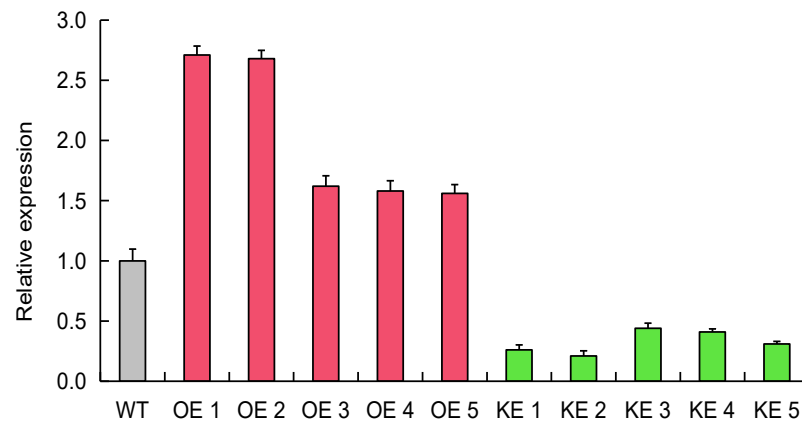

**Supplementary Figure S3.** Expression levels of the target gene in *TaABII* transgenic wheat lines. Data are shown by average from triplicate results plus standard error. The expression values of target gene were normalized by *Tatubulin*, a constitutive gene in *T. aestivum* species whose expression level was set as 1.

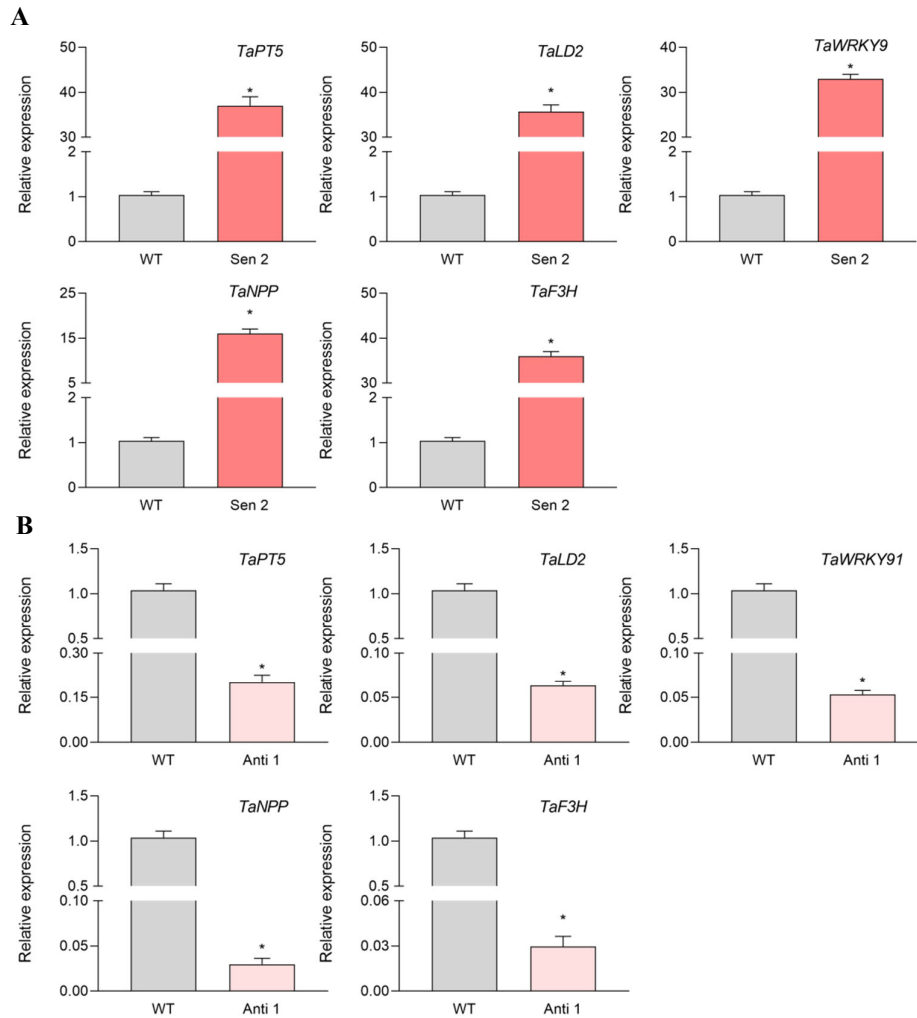

**Supplemental Figure S4.** qRT-PCR results in roots of *TaPYL5* transgenic wheat lines for the differentially expressed genes with upregulated expression pattern identified based on RNA-seq analysis. (A) Expression levels in Sen 2. (B) Expression levels in Anti 1. In (A,B): *TaPT5*, potassium transporter 5-like gene (TraesCS3D02G439300), *TaLD2*, leucoanthocyanidin dioxygenase 2-like gene (TraesCS6D02G004300), *TaWRKY9*, transcription factor WRKY9 gene (TraesCS6A02G326500), *TaNPP*, purple acid phosphatase gene (TraesCS4B02G348600), *TaF3H*, flavanone 3-hydroxylase gene (TraesCS2A02G493500). Sen 2, a transgenic line overexpressing *TaPYL5*. Anti 1, a transgenic line with *TaPYL5* knockdown expression. The constitutive gene *Tatubulin* was used as internal standard to normalize target gene transcripts, whose expression level was set as 1. \*: significant difference from the WT ( $P < 0.05$ ).

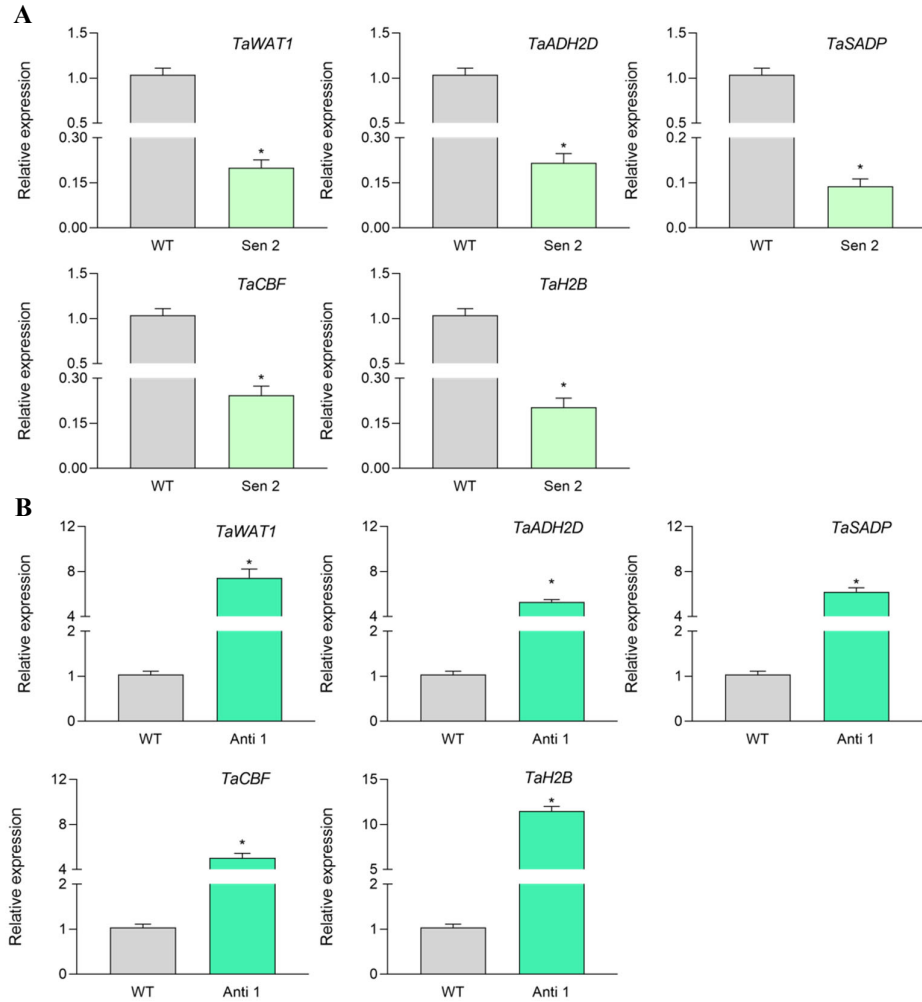

**Supplemental Figure S5.** qRT-PCR results in roots of *TaPYL5* transgenic wheat lines for the differentially expressed genes with downregulated expression pattern identified based on RNA-seq analysis. **(A)** Expression levels in Sen 2. **(B)** Expression levels in Anti 1. In **(A,B)**: *TaWAT1*, WAT1-related protein gene (TraesCS3B02G006900), *TaADH2D*, alcohol dehydrogenase ADH2D gene (TraesCS4A02G202300), *TaSADP*, S-adenosylmethionine decarboxylase proenzyme gene (TraesCS6D02G202500), *TaCBF*, AP2 domain CBF protein gene (TraesCS6D02G238200), *TaH2B*, histone H2B gene (TraesCS5D02G063200). Sen 2, a transgenic line overexpressing *TaPYL5*. Anti 1, a transgenic line with *TaPYL5* knockdown expression. The constitutive gene *Tatubulin* was used as internal standard to normalize target gene transcripts, whose expression level was set as 1. \*: significant difference from the WT ( $P < 0.05$ ).

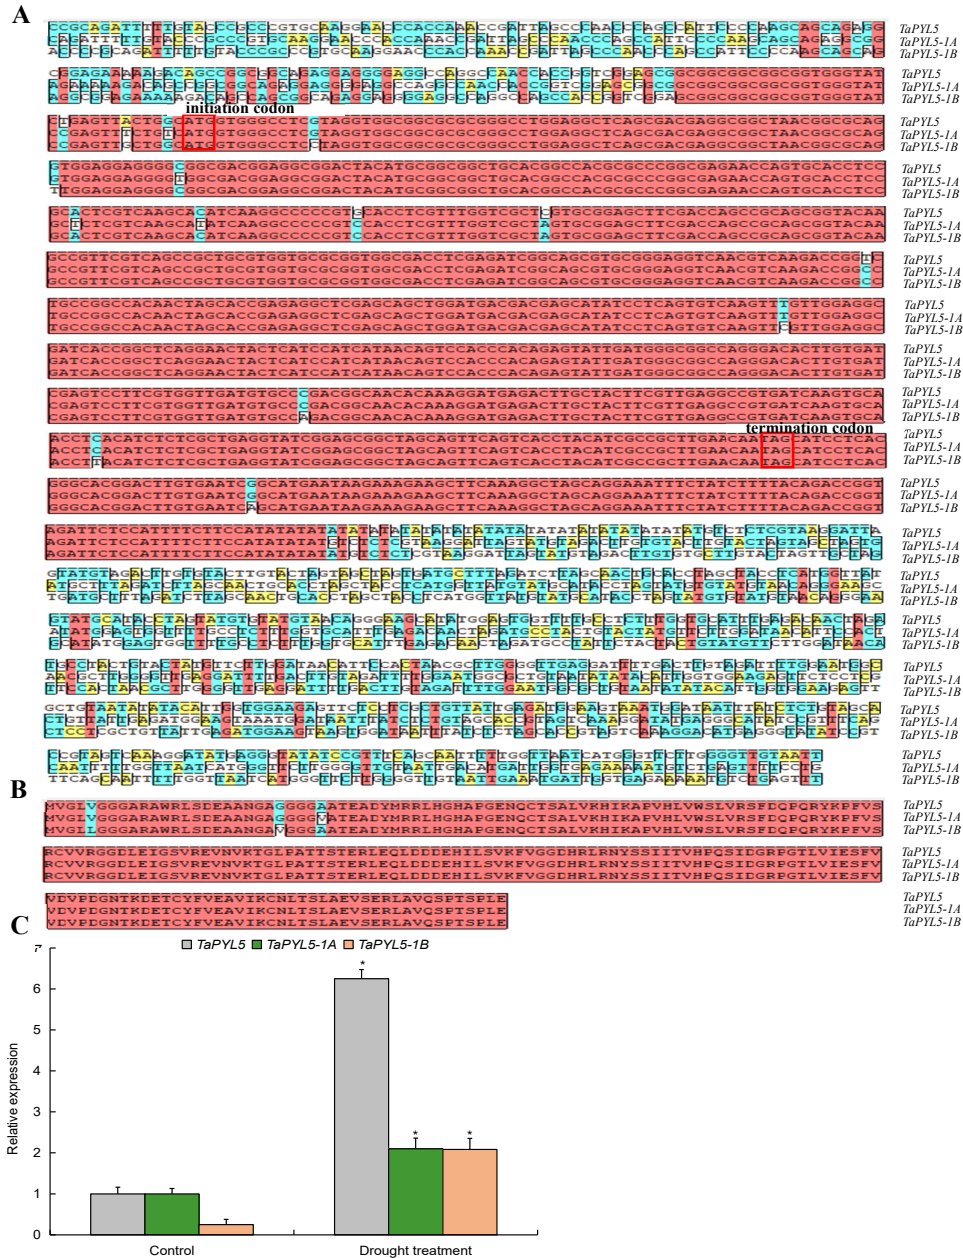

**Supplemental Figure S6.** Characterization on *TaPYL5* and its homeologs. **(A)** Alignment results among *TaPYL5* and its homeologs at nucleic acid level. **(B)** Alignment results among *TaPYL5* and its homeologous proteins situated on 1A and 1B. **(C)** Expression levels of *TaPYL5* and its homologs in roots under normal growth and drought treatment. In **(A,B)**, the sequence alignment analyses were conducted based on MEGA8. In **(C)**, root tissues of wheat seedlings (cv. Shimai 26) at the third-leaf stage grown in standard MS solution (control) and modified MS solution provided by PEG-6000 (10%, w/v) were collected and subjected to qRT-PCR analysis using specific primers. Constitutive gene *Tatubulin* was used as an internal standard to normalize the target transcripts, whose expression level was set as 1. \*: significant difference compared with Control ( $P < 0.05$ ).

**Supplementary Table S1.** PCR primers used in this study

| Purpose                               | Accession number       | Forward primer (5'-)                 | Reverse primer (5'-)                   |
|---------------------------------------|------------------------|--------------------------------------|----------------------------------------|
| <i>TaPYL5</i> expression              | TraesCS1A02G1<br>26800 | ATGGTGGGCCTCGTAGGTGGCGG              | CTATTGTTCAAGCGGCGATGTAGGT              |
| <i>Tatubulin</i> expression           | U76558                 | CATGCTATCCCTCGTCTCGACCT              | CGCACTTCATGATGGAGTTGTAT                |
| <i>TaPYL5</i> location                | XM_037633867           | AAAGGTACCATGGTGGGCCTCGTAGGTGGC<br>GG | AAAAAGCTTCTATTGTTCAAGCGGCGAT<br>GTAGGT |
| <i>TaPYL5</i> overexpression          | XM_037633867           | TTTCCATGGTGGGCCTCGTAGGTG             | TTTGTAACCTATTGTTCAAGCGGCGA             |
| <i>TaPYL5</i> knockdown expression    | XM_037633867           | AAACCATGGCAAAGAGTATCACAGCA           | AAAGGTAACCACTGCACCTCCGCA               |
| <i>TaPYL5</i> bait in two-hybrid      | XM_037633867           | AAAGAATTCATGGTGGGCCTCGTAGGTGGC<br>GG | AAAGGATTCCTATTGTTCAAGCGGCGAT<br>GTAGGT |
| <i>TaPP2C6</i> prey in two-hybrid     | TraesCS1A02G3<br>58600 | TTTGAATTCATGGCGGCGGCGCGCGG           | TTTCTGCAGGTACAGCTTTGCTCATCCG           |
| <i>TaPP2C8</i> prey in two-Hybrid     | TraesCS1A02G4<br>41200 | TTTGAATTCATGGACGCCCTAGGCGCC          | TTTCTGCAGGTATCTGTTGTTGTTGT             |
| <i>TaPP2C9</i> prey in two-hybrid     | TraesCS1B02G3<br>75100 | TTTGAATTCATGGCGGCGGCGCGCGG           | TTTCTGCAGGTTAGGAATTATCTTGG             |
| <i>TaPP2C50</i> prey in two-Hybrid    | TraesCS1D02G3<br>63500 | TTTGAATTCATGGCGGCGGCGCGCGCC          | TTTCTGCAGGTTAGGAATTATCTTGG             |
| <i>TaPP2C53</i> prey in two-hybrid    | TraesCS1A02G4<br>41200 | TTTGAATTCATGGACGCCCTAGGCGCC          | TTTCTGCAGGTATCTGTTGTTATTGT             |
| <i>TaSnRK2.1</i> prey in two-hybrid   | TraesCS2A02G4<br>93800 | TTTGAATTCATGGATCGGTACGAGGTG          | TTTGGATCCTCACACGGGCACACGAAA            |
| <i>TaSnRK2.2</i> prey in two-hybrid   | TraesCS2A02G1<br>63800 | TTTGAATTCATGGAGCGGTACGAGGTG          | TTTGGATCCTCACACGCGCACACGAA             |
| <i>TaSnRK2.3</i> prey in two-hybrid   | TraesCS1A02G2<br>15900 | TTTGAATTCATGGAGGAGAGGTACGAG          | TTTGGATCCTCAGTAGGTCTCCCCCTC            |
| <i>TaSnRK2.4</i> prey in two-hybrid   | TraesCS3A02G3<br>81100 | TTTGAATTCATGGAGAAGTACGAGGCG          | TTTGGATCCTCATGATATGCGTAGCGA            |
| <i>TaSnRK2.5</i> prey in two-hybrid   | TraesCS2A02G5<br>66700 | TTTGAATTCATGGAGAAGTACGAGCCGG         | TTTGGATCCTCAGATTGGAGCTTGCT             |
| <i>TaSnRK2.6</i> prey in two-hybrid   | TraesCS2A02G3<br>03900 | TTTGAATTCATGGAGAGGTACGAGCTG          | TTTGGATCCCTAGCTGATGTGGAATC             |
| <i>TaSnRK2.7</i> prey in two-hybrid   | TraesCS1A02G2<br>70800 | TTTGAATTCATGGACAAGTACGAGGAGG         | TTTGGATCCTTAGATGTGCAACACGCT            |
| <i>TaPP2C53</i> expression            | TraesCS1A02G4<br>41200 | ATGGACGCCCTAGGCGCC                   | CTATCTGTTGTTGTGTCAG                    |
| <i>TaPP2C53</i> overexpression        | TraesCS1A02G4<br>41200 | AAACCATGGATGGACGCCCTAGGCGCC          | AAAGGTAACCCTATCTGTTGTTGTTGT            |
| <i>TaPP2C53</i> knockdown expression  | TraesCS1A02G4<br>41200 | AAACCATGGATGGACGCCCTAGGCGCC          | AAAGGTAACCCTAGGCGCCGCGCTGCC            |
| <i>TaSnRK2.1</i> expression           | TraesCS2A02G4<br>93800 | GGGACATAGGAAGAAAGAGGG                | GGAAGCATGACAAAACAGGGAT                 |
| <i>TaSnRK2.1</i> overexpression       | TraesCS2A02G4<br>93800 | AAAAGATCTATGGATCGGTACGAGGTG          | AAAGGTAACCACTCATGAGCAAT                |
| <i>TaSnRK2.1</i> knockdown expression | TraesCS2A02G4<br>93800 | AAAAGATCTATGACAAAACAGGGATCC          | AAAGGTAACCAAGGAGCACTT                  |
| <i>TaABI1</i> expression              | AB238930               | ATGGAGGACGTGGCCGTG                   | GGAAGTTCAAGAGCAAACTTAA                 |

|                                    |                        |                              |                                 |
|------------------------------------|------------------------|------------------------------|---------------------------------|
| <i>TaABI1</i> overexpression       | AB238930               | AAACCATGGATGGAGGACGTGGCCGTG  | AAAGGTAACCTTAAGTTTGTCTTTGAACTTC |
| <i>TaABI1</i> knockdown expression | AB238930               | AAACCATGGATGTTGTCTTGTCTCCC   | AAAGGTAACCTTAGCCCCGCCACGGCC     |
| <i>TaPYL5</i> -BiFC                | XM_037633867           | AAAGGATCCATGGTGGGCCTCGTAGG   | AAAGGTACCGTATTGTTCAAGCGGCG      |
| <i>TaPP2C53</i> - BiFC             | TraesCS1A02G4<br>41200 | AAAGGATCCATGGACGCCCTAGGCGC   | AAAGTCGAGTATCTGTTGTTATTGT       |
| <i>TaSnRK2.1</i> - BiFC            | TraesCS2A02G4<br>93800 | AAAGGATCCATGGATCGGTACGAGGTG  | AAAGTCGACCACTCATGAGCAAT         |
| <i>TaPYL5</i> Pro-D1               | XM_037633867           | TTGGATCCGGTCATGTGTACATGACC   | TTGTCGACGCCAGTAACCTCAGATACC     |
| <i>TaPYL5</i> Pro-D2               | XM_037633867           | TTGGATCCGGGCGAAGGGATAGAAAC   | TTGTCGACGCCAGTAACCTCAGATACC     |
| <i>TaPYL5</i> Pro-D3               | XM_037633867           | TTGGATCCGAAGATGGTGCATGGTTGG  | TTGTCGACGCCAGTAACCTCAGATACC     |
| <i>TaPYL5</i> Pro-D4               | XM_037633867           | TTGGATCCGCCCGCGGTAGTTTCC     | TTGTCGACGCCAGTAACCTCAGATACC     |
| <i>TaPYL5</i> Pro-D5               | XM_037633867           | TTGGATCCCCTCCGCGACGAGATGGTCC | TTGTCGACGCCAGTAACCTCAGATACC     |
| <i>TaPT5</i> expression            | TraesCS3D02G4<br>39300 | ATGGCGGTGCCTCTGAAAGC         | CTAGATCTCATATGTCATACCC          |
| <i>TaLD2</i> expression            | TraesCS6D02G0<br>04300 | ATGGCGCGCGTGGAGGCGC          | TTAATTAACCTTCCACTAGGTTGGCT      |
| <i>TaWRKY9</i> expression          | TraesCS6A02G3<br>26500 | ATGTCATCATCAAAGAGG           | TCAACCAACCCCCCACTTGT            |
| <i>TaNPP</i> expression            | TraesCS4B02G3<br>48600 | ATGGGGATGGCGCATGTCGC         | CCACCACACTCGCTAGCTGA            |
| <i>TaF3H</i> expression            | TraesCS2A02G4<br>93500 | ATGGCGCCGGTGAGCAACGAG        | TCAGGCAAGAATTTCGTTGAGAGA        |
| <i>TaWAT1</i> expression           | TraesCS3B02G0<br>06900 | ATGGCGGACGCGGTGGATG          | TCAGACATTGTCGGAGGTGGT           |
| <i>TaADH2D</i> expression          | TraesCS4A02G2<br>02300 | ATGGCGGACGCGGTGGATG          | TCAGACATTGTCGGAGGTGGT           |
| <i>TaSADP</i> expression           | TraesCS6D02G2<br>02500 | ATGGCCGTCTCTGCGATTGG         | TAAGAAGATGAAGAGCTCCTGA          |
| <i>TaCBF</i> expression            | TraesCS6D02G2<br>38200 | ATGGACCTCAGTGCCCTC           | TCAGTAGCTCCACAAGCTGACC          |
| <i>TaH2B</i> expression            | TraesCS5D02G0<br>63200 | ATGGCCCCAAGCGGAGAAG          | CAAGTTCACCTCCTCCTAG             |

---



**Supplementary Table S2.** Drought-related *cis*-acting elements in the *TaPYL5* promoter

| Site Name            | Organism | Position | Matrix score. | Species              | Function                                                        |
|----------------------|----------|----------|---------------|----------------------|-----------------------------------------------------------------|
| MBS                  | CAACTG   | 1394     | -             | Arabidopsis thaliana | MYB binding site involved in drought-inducibility               |
| MYB recognition site | CCGTTG   | 577      | -             |                      |                                                                 |
| MYB-binding site     | CAACAG   | 997      | -             | Nicotiana tabacum    | cis-acting regulatory element                                   |
| MYB                  | CAACTG   | 1394     | -             | Arabidopsis thaliana |                                                                 |
| MYB                  | CAACCA   | 974      | -             |                      |                                                                 |
|                      | CAACAG   | 997      | -             |                      |                                                                 |
|                      | CAACCA   | 1367     | -             |                      |                                                                 |
|                      |          | 1949     | +             |                      |                                                                 |
| DRE core             | GCCGAC   | 257      | -             |                      |                                                                 |
|                      |          | 1415     | -             |                      |                                                                 |
|                      |          | 1680     | +             |                      |                                                                 |
| ABRE                 | ACGTG    | 437      | +             | Arabidopsis thaliana | cis-acting element involved in the abscisic acid responsiveness |
|                      |          | 1293     | -             |                      |                                                                 |
